# Supplementary material for: Gradual Changes of Gut Microbiota in Weaned Miniature Piglets
Source: Front Microbiol. 2016 Nov 2;7:1727. doi: 10.3389/fmicb.2016.01727 (PMC5090779; doi:10.3389/fmicb.2016.01727)
Supplement: Supplementary file 5 [file DataSheet4.XLSX]

## Sheet: Sheet1
	3 d			5 d			6 d			8 d			11 d
Species	mean relative abundance	variance	std.err	mean relative abundance	variance	std.err	mean relative abundance	variance	std.err	mean relative abundance	variance	std.err	mean relative abundance	variance	std.err	Diff	P- value (corrected)
Erysipelothrix rhusiopathiae	2.6e-05	0	8e-06	0	0	0	0	0	0	0	0	0	0	0	0	3 d vs 5 d	0.017814
																3 d vs 6 d	0.019914
																3 d vs 8 d	0.009614
																3 d vs 11 d	0.017276
Clostridium asparagiforme	2.7e-05	0	5e-06	0	0	0	0	0	0	0	0	0	1e-05	0	1e-05	3 d vs 5 d	0.004504
																3 d vs 6 d	0.003767
																3 d vs 8 d	0.001833
Clostridium colinum	3.9e-05	0	8e-06	1e-05	0	1e-05	0	0	0	1e-05	0	1e-05	0	0	0	3 d vs 5 d	0.039469
																3 d vs 6 d	0.002828
																3 d vs 8 d	0.030553
																3 d vs 11 d	0.004526
Oxalobacter formigenes	7.7e-05	0	3.1e-05	1e-05	0	1e-05	0	0	0	5e-06	0	5e-06	0	0	0	3 d vs 6 d	0.040448
																3 d vs 8 d	0.034825
																3 d vs 11 d	0.033026
Clostridium sporosphaeroides	1.8e-05	0	1.8e-05	2.1e-05	0	2.1e-05	1.5e-05	0	1.5e-05	4.9e-05	0	1e-05	5e-06	0	5e-06	8 d vs 11 d	0.006207
Cellulosilyticum ruminicola	5.5e-05	0	2.1e-05	4.2e-05	0	2.3e-05	4.4e-05	0	1.8e-05	0	0	0	0	0	0	3 d vs 8 d	0.025395
																3 d vs 11 d	0.027474
																6 d vs 8 d	0.03627
																6 d vs 11 d	0.043044
Clostridium viride	7.5e-05	0	1.3e-05	2.1e-05	0	2.1e-05	3.1e-05	0	2.3e-05	4.8e-05	0	3.5e-05	1.9e-05	0	1.2e-05	3 d vs 5 d	0.042973
																3 d vs 11 d	0.018034
Mucispirillum schaedleri	9e-05	0	5.8e-05	8.6e-05	0	2.3e-05	3.2e-05	0	2.5e-05	1e-05	0	5e-06	1.5e-05	0	1.5e-05	5 d vs 8 d	0.021066
																5 d vs 11 d	0.03028
Sutterella stercoricanis	0.000245	0	0.000218	2.1e-05	0	5e-06	5e-06	0	5e-06	1.4e-05	0	1.4e-05	8.7e-05	0	7.3e-05	5 d vs 6 d	0.049957
Clostridium leptum	5.8e-05	0	1.4e-05	0.000152	0	7.6e-05	0.000135	0	6.2e-05	2.1e-05	0	1.4e-05	1.4e-05	0	8e-06	3 d vs 11 d	0.025698
uncultured eubacterium WCHA1-33	7.8e-05	0	4.2e-05	0.00015	0	4e-05	0.000124	0	2.6e-05	2.9e-05	0	2.3e-05	5e-06	0	5e-06	5 d vs 8 d	0.032
																5 d vs 11 d	0.012914
																6 d vs 8 d	0.022876
																6 d vs 11 d	0.009055
Acinetobacter lwoffii	0.000278	0	1.9e-05	0.000201	0	0.000107	3.3e-05	0	1.7e-05	0	0	0	0	0	0	3 d vs 6 d	0
																3 d vs 8 d	0.000921
																3 d vs 11 d	0
Enterorhabdus mucosicola	0.000142	0	4.6e-05	0.000135	0	6.3e-05	0.000233	0	0.000116	4.1e-05	0	2.8e-05	9e-06	0	5e-06	3 d vs 11 d	0.020647
Psychrobacter faecalis	0.0002	0	6e-05	0.000381	0	0.000203	1.4e-05	0	8e-06	0	0	0	0	0	0	3 d vs 6 d	0.028862
																3 d vs 8 d	0.008702
																3 d vs 11 d	0.013716
Butyricimonas virosa	0.000454	0	0.000138	0.000361	0	0.000136	0.00016	0	4.2e-05	8.7e-05	0	1.6e-05	0.00016	0	8.1e-05	3 d vs 8 d	0.026307
Campylobacter coli	0.00054	0	0.000334	0.00082	0	0.000218	9.2e-05	0	1.9e-05	0.000182	0	0.000122	1e-05	0	1e-05	5 d vs 6 d	0.014926
																5 d vs 8 d	0.036297
																5 d vs 11 d	0.011849
																6 d vs 11 d	0.014824
Parabacteroides goldsteinii	0.000957	1e-06	0.000604	0.000235	0	9.2e-05	0.000229	0	0.00016	0.000202	0	0.0001	2.8e-05	0	1.6e-05	5 d vs 11 d	0.048613
Turicibacter sanguinis	0.000806	0	0.000202	0.000365	0	7.3e-05	0.000658	0	0.000201	0.000118	0	1.2e-05	6.7e-05	0	6.7e-05	3 d vs 8 d	0.006965
																3 d vs 11 d	0.010431
																5 d vs 8 d	0.017637
																5 d vs 11 d	0.021742
																6 d vs 8 d	0.028416
																6 d vs 11 d	0.032802
Bilophila wadsworthia	0.001361	2e-06	0.000851	0.000271	0	1.3e-05	0.000406	0	6.2e-05	0.000153	0	0.0001	4.7e-05	0	3.4e-05	5 d vs 11 d	0.007516
																6 d vs 8 d	0.048337
																6 d vs 11 d	0.005571
Treponema parvum	0.000714	1e-06	0.000564	0.000671	0	0.000181	0.000769	0	0.000104	0.00022	0	0.000183	0.000149	0	0.000142	5 d vs 11 d	0.04328
																6 d vs 8 d	0.030528
																6 d vs 11 d	0.020484
Coprococcus comes	0.00109	1e-06	0.000473	0.001096	0	0.000134	0.000764	0	0.000212	0.000867	0	0.000324	0.000495	0	0.000172	5 d vs 11 d	0.027054
Sporobacter termitidis	0.001066	0	0.000301	0.001626	2e-06	0.000844	0.001149	1e-06	0.000497	0.001325	1e-06	0.000578	4.5e-05	0	1.8e-05	3 d vs 11 d	0.011931
																8 d vs 11 d	0.044134
Ruminococcus bromii	0.006745	8e-06	0.001649	0.00482	4e-06	0.001164	0.004133	6e-06	0.001461	0.003178	1e-06	0.000695	0.003542	4e-06	0.001185	3 d vs 8 d	0.048842
Oscillibacter valericigenes	0.00479	9e-06	0.001738	0.007676	1.4e-05	0.002141	0.006457	3e-06	0.00102	0.004646	1.4e-05	0.002135	0.002292	4e-06	0.001151	5 d vs 11 d	0.049677
																6 d vs 11 d	0.034
Desulfovibrio piger	0.015614	3.8e-05	0.003581	0.01762	0.00012	0.006332	0.021458	2.8e-05	0.003068	0.007212	1.2e-05	0.002036	0.003963	1e-06	0.000555	3 d vs 8 d	0.046228
																3 d vs 11 d	0.016517
																6 d vs 8 d	0.011022
																6 d vs 11 d	0.004374
	3 d			5 d			6 d			8 d			11 d
Species	mean relative abundance	variance	std.err	mean relative abundance	variance	std.err	mean relative abundance	variance	std.err	mean relative abundance	variance	std.err	mean relative abundance	variance	std.err	Diff	P- value (corrected)
Lactobacillus coleohominis	0	0	0	0	0	0	1.5e-05	0	1.5e-05	5e-06	0	5e-06	4.8e-05	0	2e-05	3 d vs 11 d	0.03706
																5 d vs 11 d	0.036785
Howardella ureilytica	2.4e-05	0	2.4e-05	0	0	0	0	0	0	2e-05	0	5e-06	2.4e-05	0	1.7e-05	5 d vs 8 d	0.013055
																6 d vs 8 d	0.009933
Dorea longicatena	6e-06	0	6e-06	1.1e-05	0	5e-06	5e-06	0	5e-06	2.4e-05	0	1e-05	3.4e-05	0	4e-06	3 d vs 11 d	0.00881
																5 d vs 11 d	0.017237
																6 d vs 11 d	0.010253
Clostridium methylpentosum	3.3e-05	0	1.1e-05	2.7e-05	0	1.5e-05	2.5e-05	0	8e-06	4.9e-05	0	3e-06	4.5e-05	0	1.8e-05	6 d vs 8 d	0.023966
Parasutterella excrementihominis	1.2e-05	0	1.2e-05	0	0	0	0	0	0	0	0	0	0.000199	0	7.7e-05	3 d vs 11 d	0.034578
																5 d vs 11 d	0.029215
																6 d vs 11 d	0.036363
																8 d vs 11 d	0.02289
Eubacterium hallii	6.3e-05	0	2.4e-05	3.3e-05	0	1.7e-05	5.9e-05	0	9e-06	5.3e-05	0	1.1e-05	0.000101	0	3.4e-05	3 d vs 11 d	0.008771
																5 d vs 11 d	0.047417
																6 d vs 11 d	0.039848
																8 d vs 11 d	0.046304
Collinsella aerofaciens	6e-06	0	6e-06	3.8e-05	0	3.1e-05	0.000169	0	7.1e-05	0.0001	0	2.5e-05	7.6e-05	0	3.3e-05	3 d vs 6 d	0.043276
																3 d vs 8 d	0.006053
																3 d vs 11 d	0.048405
Fibrobacter intestinalis	1.8e-05	0	1e-05	0.000123	0	2.4e-05	5.9e-05	0	2.1e-05	8.1e-05	0	4.7e-05	0.000201	0	6.3e-05	3 d vs 5 d	0.007204
																3 d vs 11 d	0.021405
Parabacteroides merdae	0.000132	0	0.000123	8.8e-05	0	8.1e-05	0.000163	0	0.000155	5e-06	0	5e-06	0.000513	0	0.000196	8 d vs 11 d	0.024159
Treponema berlinense	0.000179	0	6.1e-05	0.000862	0	0.000252	0.000415	0	0.000141	0.00043	0	0.000268	0.00034	0	0.00034	3 d vs 5 d	0.031292
Roseburia inulinivorans	0.000185	0	8.1e-05	0.000662	1e-06	0.000629	0.000123	0	0.000105	0.001388	0	0.000399	0.000785	0	0.000398	3 d vs 8 d	0.014904
																6 d vs 8 d	0.016157
Coprococcus catus	2.4e-05	0	1.6e-05	4.8e-05	0	2.4e-05	4.5e-05	0	2.8e-05	0.000273	0	0.000139	0.004079	1.1e-05	0.001928	3 d vs 11 d	0.049164
Lactobacillus frumenti	0.000287	0	0.000125	0.000357	0	0.000179	0.001379	1e-06	0.00048	0.002392	7e-06	0.001556	0.001349	2e-06	0.000769	3 d vs 6 d	0.045948
Lactobacillus gasseri LA39	0.00067	0	0.000394	0.001454	5e-06	0.001254	0.001504	3e-06	0.001011	0.001991	3e-06	0.001067	0.002138	4.58816e-08	0.0001237	3 d vs 6 d	0.012533
																3 d vs 8 d	0.032022
																3 d vs 11 d	0.045178
																5 d vs 8 d	0.049133
																5 d vs 11 d	0.030222
																6 d vs 11 d	0.044417
Treponema porcinum	0.0019	1e-06	0.000618	0.002935	4e-06	0.001097	0.001086	0	0.000136	0.001962	7e-06	0.001522	0.002104	0	0.000278	6 d vs 11 d	0.026121
Prevotella stercorea	0.001667	0	0.000399	0.003053	4e-06	0.001086	0.001009	0	0.000223	0.003168	0	0.000317	0.006231	1.7e-05	0.002373	3 d vs 8 d	0.015816
																6 d vs 8 d	0.002
Prevotella copri	0.026936	0.000351	0.01081	0.115902	0.007756	0.050845	0.16994	0.002745	0.030251	0.224582	0.018871	0.079311	0.197602	0.012687	0.065031	3 d vs 6 d	0.0075
																3 d vs 8 d	0.027991
																3 d vs 11 d	0.030043
	3 d			5 d			6 d			8 d			11 d
Species	mean relative abundance	variance	std.err	mean relative abundance	variance	std.err	mean relative abundance	variance	std.err	mean relative abundance	variance	std.err	mean relative abundance	variance	std.err	Diff	P- value (corrected)
Parasutterella secunda	0.000124	0	0.000116	3.7e-05	0	6e-06	9e-06	0	9e-06	0	0	0	0.000161	0	7.3e-05	5 d vs 6 d	0.032
																5 d vs 8 d	0.004385
																8 d vs 11 d	0.045402
Clostridium glycolicum	0.000296	0	6.2e-05	0.000582	0	0.000171	0.000927	0	0.000191	0.000102	0	2.4e-05	1e-05	0	5e-06	3 d vs 6 d	0.024578
																3 d vs 8 d	0.016728
																3 d vs 11 d	0.006147
																5 d vs 8 d	0.027637
																5 d vs 11 d	0.016172
																6 d vs 8 d	0.00782
																6 d vs 11 d	0.007857
